# Supplementary material
Source: Springer Nature journal article supplement (https://www.springermedizin.de/resource/supplementary/12913_2006_382_MOESM6_ESM.pdf/9535064)
Supplement: MOESM6 [file 9535064]

Table 3. Two-part models of general practitioner, specialist, and hospital services (continued)

| Variable                             | General practitioners |                                     | Specialists |                                     | Hospitals   |                                     |
|--------------------------------------|-----------------------|-------------------------------------|-------------|-------------------------------------|-------------|-------------------------------------|
|                                      | Logistic              | Zero-truncated<br>negative binomial | Logistic    | Zero-truncated<br>negative binomial | Logistic    | Zero-truncated<br>negative binomial |
|                                      | OR                    | IRR                                 | OR          | IRR                                 | OR          | IRR                                 |
| Overweight                           |                       |                                     |             |                                     |             |                                     |
| Underweight or acceptable weight     | 1.00                  | 1.00                                | 1.00        | 1.00                                | 1.00        | 1.00                                |
| Overweight                           | 1.06 *                | 1.03 *                              | 0.99        | 1.00                                | 1.02        | 1.03                                |
| Missing                              | 0.97                  | 1.33 ***                            | 1.22 **     | 1.34 ***                            | 0.78 *      | 0.90                                |
| Smoking                              | ***                   |                                     | ***         |                                     |             |                                     |
| Never smoked                         | 1.00                  | 1.00                                | 1.00        | 1.00                                | 1.00        | 1.00                                |
| Former smoker                        | 1.04                  | 1.02                                | 1.14 ***    | 1.01                                | 1.09        | 1.05                                |
| Current smoker                       | 0.77 ***              | 1.00                                | 0.90 **     | 0.98                                | 0.98        | 1.07                                |
| Missing                              | 1.03                  | 0.88                                | 0.91        | 0.93                                | 1.24        | 0.65                                |
| Drinking                             | **                    | ***                                 |             | ***                                 | ***         | ***                                 |
| Not regular drinker                  | 1.00                  | 1.00                                | 1.00        | 1.00                                | 1.00        | 1.00                                |
| Regular drinker                      | 1.09 **               | 0.89 ***                            | 1.04        | 0.85 ***                            | 0.74 ***    | 0.97 ***                            |
| Missing                              | 1.43 *                | 0.81 *                              | 0.97        | 1.37                                | 1.33        | 0.91                                |
| Physical activity                    | **                    | **                                  |             |                                     | ***         |                                     |
| Active                               | 1.00                  | 1.00                                | 1.00        | 1.00                                | 1.00        | 1.00                                |
| Moderate or inactive                 | 1.08 *                | 1.06 ***                            | 1.04        | 1.05                                | 1.18 ***    | 0.99                                |
| Missing                              | 1.51 **               | 1.12                                | 1.10        | 1.33                                | 1.27        | 1.38                                |
| Fruit and vegetable consumption      | **                    | ***                                 | ***         |                                     | *           |                                     |
| 5+ servings a day                    | 1.00                  | 1.00                                | 1.00        | 1.00                                | 1.00        | 1.00                                |
| Less than 5 servings a day           | 0.94 *                | 0.92 ***                            | 0.88 ***    | 0.97                                | 0.91 **     | 0.97                                |
| Missing                              | 0.75 **               | 0.88 *                              | 0.78 *      | 0.96                                | 0.79        | 0.78                                |
| Alternative health care <sup>^</sup> | 1.43 ***              | 1.20 ***                            | 1.28 ***    | 1.11 **                             | 0.92        | 1.00                                |
| Province of residence                | **                    | **                                  | ***         | **                                  | **          | **                                  |
| ON                                   | 1.00                  | 1.00                                | 1.00        | 1.00                                | 1.00        | 1.00                                |
| NF                                   | 1.59 ***              | 1.20 ***                            | 1.04        | 0.92                                | 1.29 **     | 1.22 *                              |
| PEI                                  | 1.05                  | 0.93 *                              | 0.88 *      | 0.97                                | 1.48 ***    | 1.27 **                             |
| NS                                   | 1.00                  | 1.03                                | 0.91 *      | 0.80 ***                            | 1.02        | 1.06                                |
| NB                                   | 1.23 ***              | 0.90 ***                            | 1.02        | 0.71 ***                            | 1.40 ***    | 1.34 ***                            |
| QC                                   | 0.66 ***              | 0.74 ***                            | 1.50 ***    | 0.80 ***                            | 1.34 ***    | 0.96                                |
| MB                                   | 0.84 ***              | 0.99                                | 0.90 *      | 1.02                                | 1.18 *      | 1.08                                |
| SK                                   | 1.12 *                | 1.06 *                              | 0.79 ***    | 0.81 **                             | 1.38 ***    | 1.00                                |
| AL                                   | 0.92 *                | 1.08 **                             | 0.71 ***    | 0.87 **                             | 1.17 **     | 1.05                                |
| BC                                   | 1.03                  | 1.14 ***                            | 0.75 ***    | 1.03                                | 1.05        | 1.03                                |
| $\alpha$                             |                       | 0.95                                |             | 2.99                                |             | 1.64                                |
| $n$                                  | 110923                | 89151                               | 111087      | 31819                               | 111104      | 11291                               |
| Pseudo-R square                      | 0.12                  |                                     | 0.11        |                                     | 0.15        |                                     |
| Log likelihood                       | -49891.01             | -38209980                           | -60018.27   | -11517957                           | -27813.50   | -5128804.50                         |
| Wald chi-square~                     | 4847.42 ***           | 13954.43 ***                        | 6072.91 *** | 2619.61 ***                         | 5297.16 *** | 2795.83 ***                         |

OR: Odds ratio, IRR: Incidence rate ratio

<sup>^</sup> The reference group is the absence of the condition or no use

<sup>^^</sup> Fifteen interaction terms are included. The coefficients are not reported due to the limited space. The reported statistical significance is overall.

\* 0.01 ≤ p < 0.05, \*\* 0.001 ≤ p < 0.01, \*\*\* p < 0.001. Given that we did not fully account for the design effect, we considered variables with a statistical significance at the 1% level as significant. Statistical significance in the row of a variable name indicates overall significance of all categories combined including missing category.

~ Wald chi-square test of the joint significance of the repressors.
